# Supplementary material
Source: PubMed Central journal article supplement (PMC1356365)
Supplement: 7600924s1.pdf [file 7600924s1.pdf]

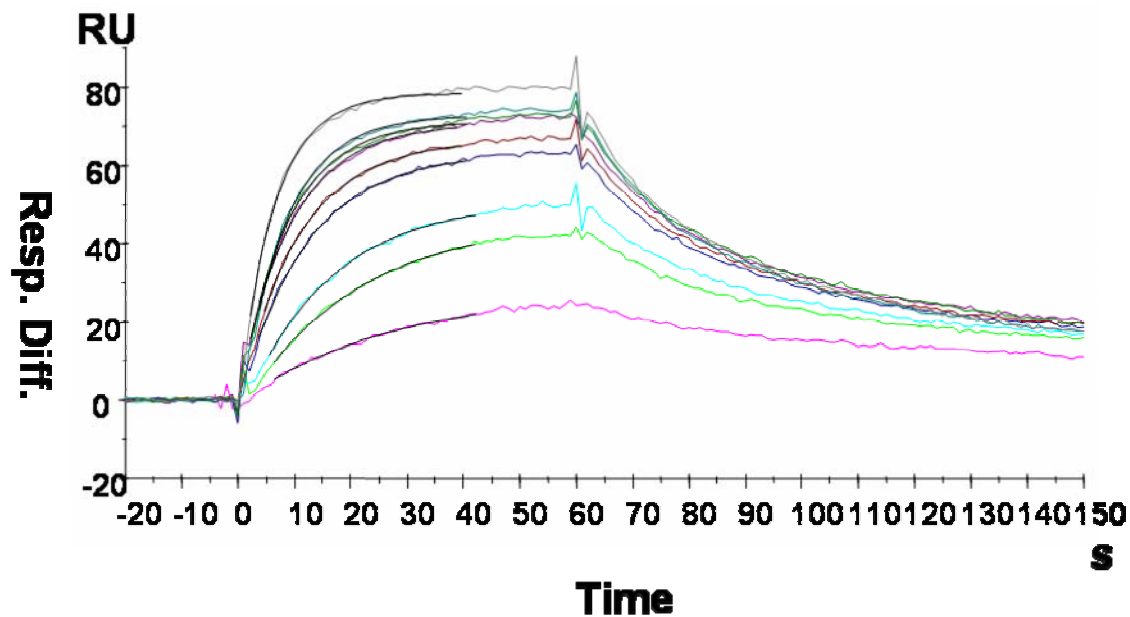

**Fig. S1 SPR sensograms showing the binding of MBP-Mae-SAM at various concentrations to immobilized Pnt-P2-SAM A218D.** About 800 RU (Response Units) of Pnt-P2-SAM A218D was immobilized onto the Biacore chip and 50  $\mu$ l MBP-Mae-SAM domain was injected at 50  $\mu$ l/min. The concentrations used were 253.8 nM, 225.6 nM, 197.4 nM, 169.2 nM, 141.0 nM 112.8 nM, 84.6 nM, 56.4 nM and 28.2 nM.

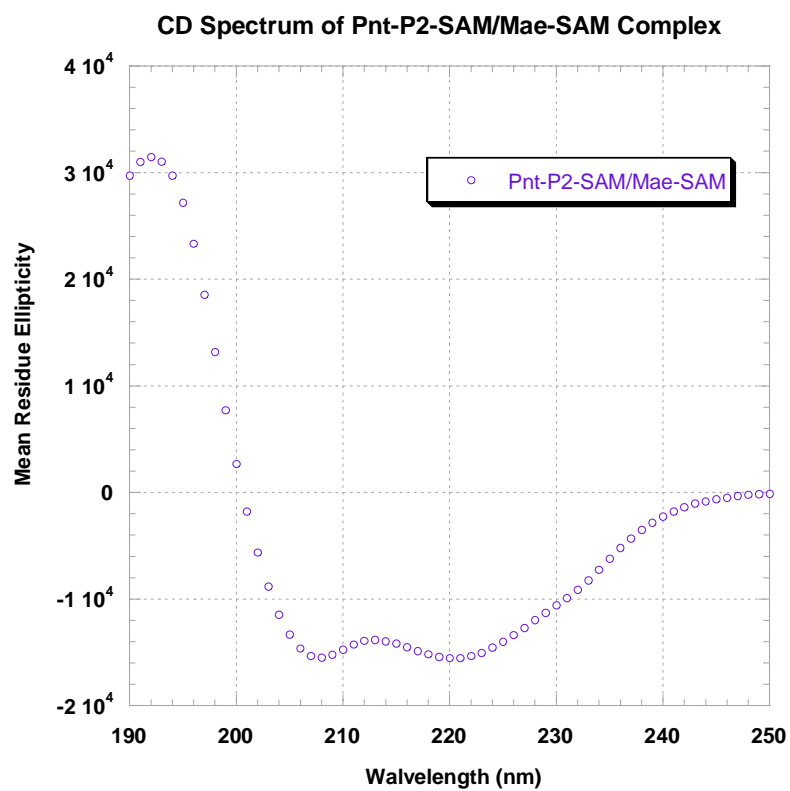

**Fig. S2 Far-UV CD spectrum of Pnt-P2-SAM/Mae-SAM Complex**
